# Supplementary material for: Full-visible-spectrum lighting enabled by an excellent cyan-emitting garnet phosphor
Source: Royal Society of Chemistry journal article supplement (doi:10.1039/d0tc00006j), 2020-01-01
Supplement: d0tc00006j1.pdf [file d0tc00006j1.pdf]

## Supporting Information

### **Full-visible-spectrum lighting enabled by an excellent cyan-emitting garnet phosphor**

Jia Liang, Balaji Devakumar, Liangling Sun, Shaoying Wang, Qi Sun, and Xiaoyong Huang\*

College of Physics and Optoelectronics, Taiyuan University of Technology, Taiyuan 030024, P.R. China

\*Corresponding author, E-mail address: [huangxy04@126.com](mailto:huangxy04@126.com)

**Table S1.** Atomic data for CYHAO:0.03Ce<sup>3+</sup>.

| <b>Atom</b> | <b>Site</b> | <b><i>x</i></b> | <b><i>y</i></b> | <b><i>z</i></b> | <b>Occu.</b> |
|-------------|-------------|-----------------|-----------------|-----------------|--------------|
| Ca          | 24c         | 0.25            | 0.625           | 0               | 0.6667       |
| Y           | 24c         | 0.25            | 0.625           | 0               | 0.3233       |
| Ce          | 24c         | 0.25            | 0.625           | 0               | 0.0100       |
| Hf          | 16a         | 0.25            | 0.75            | 0.25            | 1            |
| Al          | 24d         | 0.25            | 0.375           | 0               | 1            |
| O           | 96h         | 0.3693          | 0.46516         | 0.0394          | 1            |

**Table S2.** The values of CIE coordinates of CYHAO:0.03Ce<sup>3+</sup> phosphors when excited at 408 nm under various temperatures.

| Temperature (K) | CIE (x, y)       |
|-----------------|------------------|
| 303             | (0.2152, 0.3818) |
| 323             | (0.2160, 0.3822) |
| 343             | (0.2169, 0.3834) |
| 363             | (0.2174, 0.3844) |
| 383             | (0.2182, 0.3849) |
| 403             | (0.2183, 0.3844) |
| 423             | (0.2183, 0.3848) |
| 443             | (0.2182, 0.3840) |
| 463             | (0.2184, 0.3844) |

**Table S3.** The photoelectric properties of the LED1 device fabricated by using the commercial  $\text{CaAlSiN}_3:\text{Eu}^{2+}$  red phosphors, the commercial  $(\text{Ba,Sr})_2\text{SiO}_4:\text{Eu}^{2+}$  green phosphors, and  $\text{CYHAO}:\text{Ce}^{3+}$  cyan phosphors on a 400 nm LED chip under various driven currents.

| Current (mA) | CIE (x, y)       | Ra   | R12  | CCT (K) | Luminous efficacy (lm/W) |
|--------------|------------------|------|------|---------|--------------------------|
| 20           | (0.4081, 0.3953) | 90.3 | 80.1 | 3479    | 40.75                    |
| 40           | (0.4071, 0.3951) | 90.4 | 80.6 | 3500    | 41.88                    |
| 60           | (0.4064, 0.3950) | 90.4 | 80.8 | 3513    | 41.80                    |
| 80           | (0.4061, 0.3949) | 90.5 | 81.1 | 3519    | 41.45                    |
| 100          | (0.4058, 0.3951) | 90.6 | 81.5 | 3527    | 41.00                    |
| 120          | (0.4057, 0.3953) | 90.6 | 81.7 | 3531    | 40.34                    |
| 180          | (0.4047, 0.3953) | 90.8 | 82.5 | 3552    | 38.24                    |
| 240          | (0.4040, 0.3954) | 91.0 | 83.3 | 3569    | 36.30                    |
| 300          | (0.4032, 0.3954) | 91.1 | 84.0 | 3585    | 34.40                    |

**Table S4.** The photoelectric properties of the LED2 device fabricated by using the commercial BAM:Eu<sup>2+</sup> blue phosphors, the commercial CaAlSiN<sub>3</sub>:Eu<sup>2+</sup> red phosphors, the commercial (Ba,Sr)<sub>2</sub>SiO<sub>4</sub>:Eu<sup>2+</sup> green phosphors, and CYHAO:Ce<sup>3+</sup> cyan phosphors on a 400 nm LED chip under various drive currents.

| Current (mA) | CIE (x, y)       | Ra   | R12  | CCT (K) | Luminous efficacy (lm/W) |
|--------------|------------------|------|------|---------|--------------------------|
| 20           | (0.3958, 0.3886) | 93.4 | 90.6 | 3701    | 35.89                    |
| 40           | (0.3953, 0.3876) | 93.5 | 90.4 | 3705    | 37.05                    |
| 60           | (0.3955, 0.3874) | 93.5 | 90.4 | 3700    | 37.10                    |
| 80           | (0.3952, 0.3871) | 93.4 | 90.5 | 3704    | 36.99                    |
| 100          | (0.3949, 0.3872) | 93.4 | 90.4 | 3711    | 36.77                    |
| 120          | (0.3947, 0.3870) | 93.4 | 90.4 | 3717    | 36.43                    |
| 180          | (0.3939, 0.3865) | 93.4 | 90.3 | 3732    | 35.19                    |
| 240          | (0.3932, 0.3861) | 93.3 | 90.4 | 3744    | 33.87                    |
| 300          | (0.3923, 0.3855) | 93.3 | 90.3 | 3762    | 32.63                    |

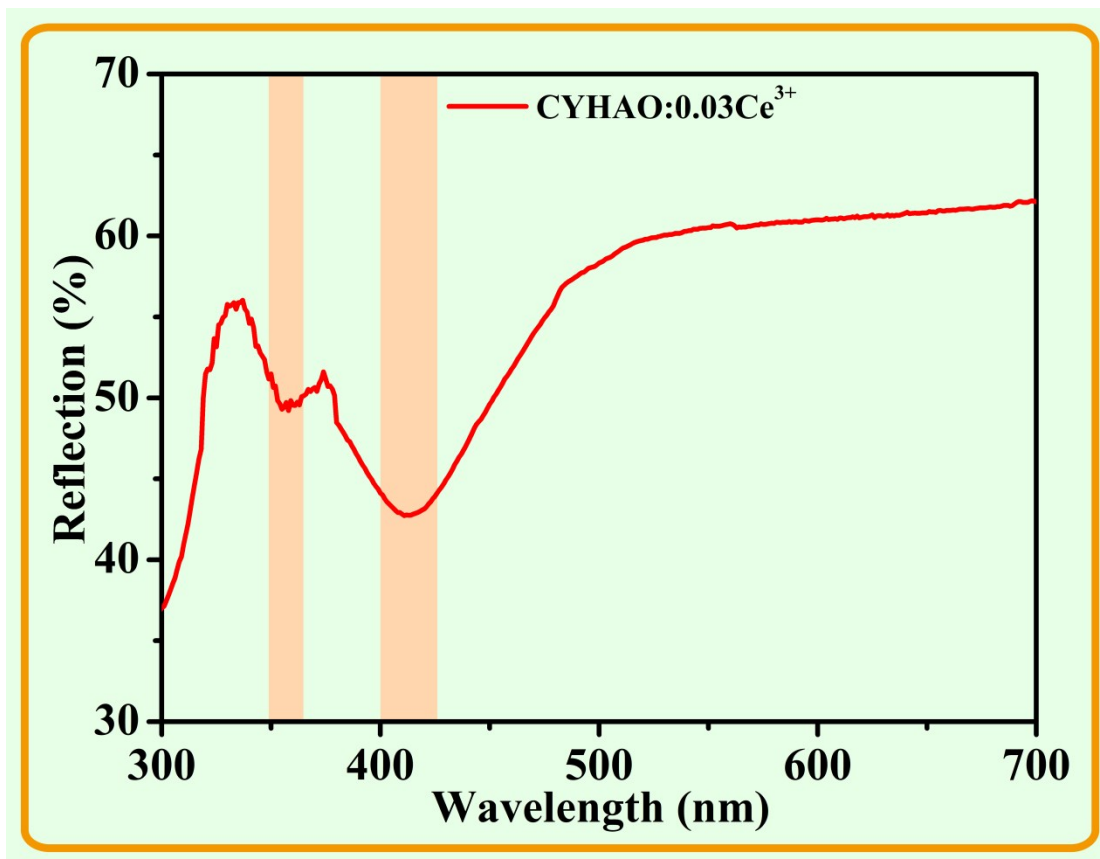

**Figure S1.** Diffuse reflectance spectrum of CYHAO:0.03Ce<sup>3+</sup> phosphors.

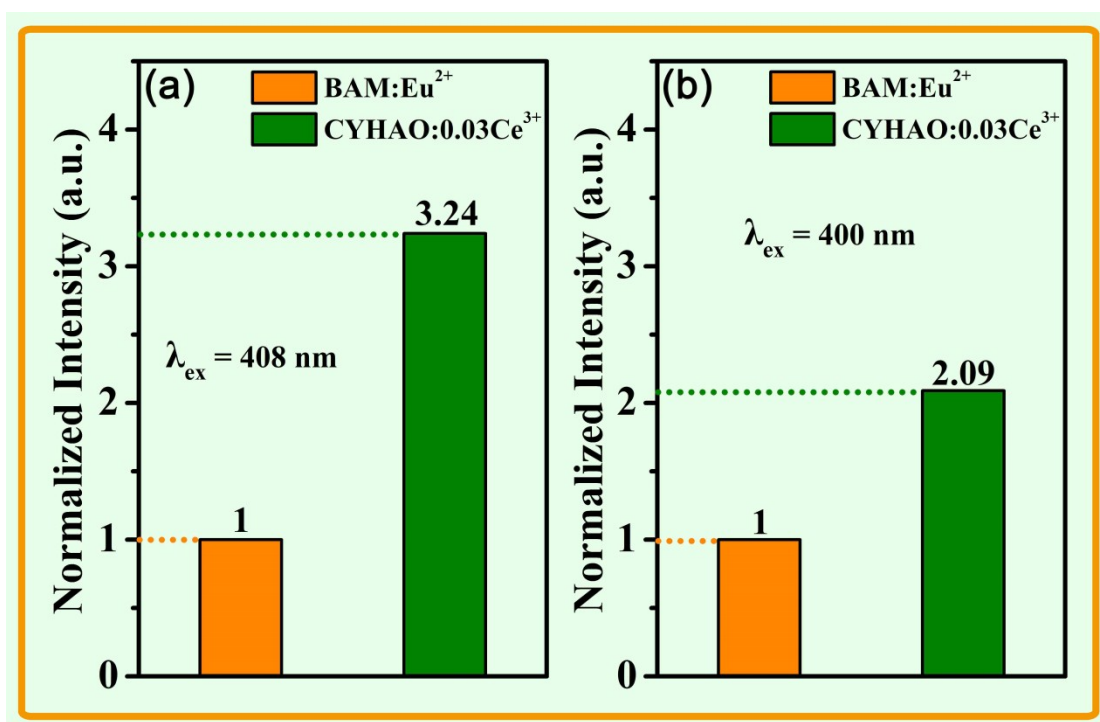

**Figure S2.** Comparison of normalized integrated emission intensity between CYHAO:0.03Ce<sup>3+</sup> and the commercial BAM:Eu<sup>2+</sup> blue phosphors under the NUV excitations of 408 nm (a) or 400 nm (b).

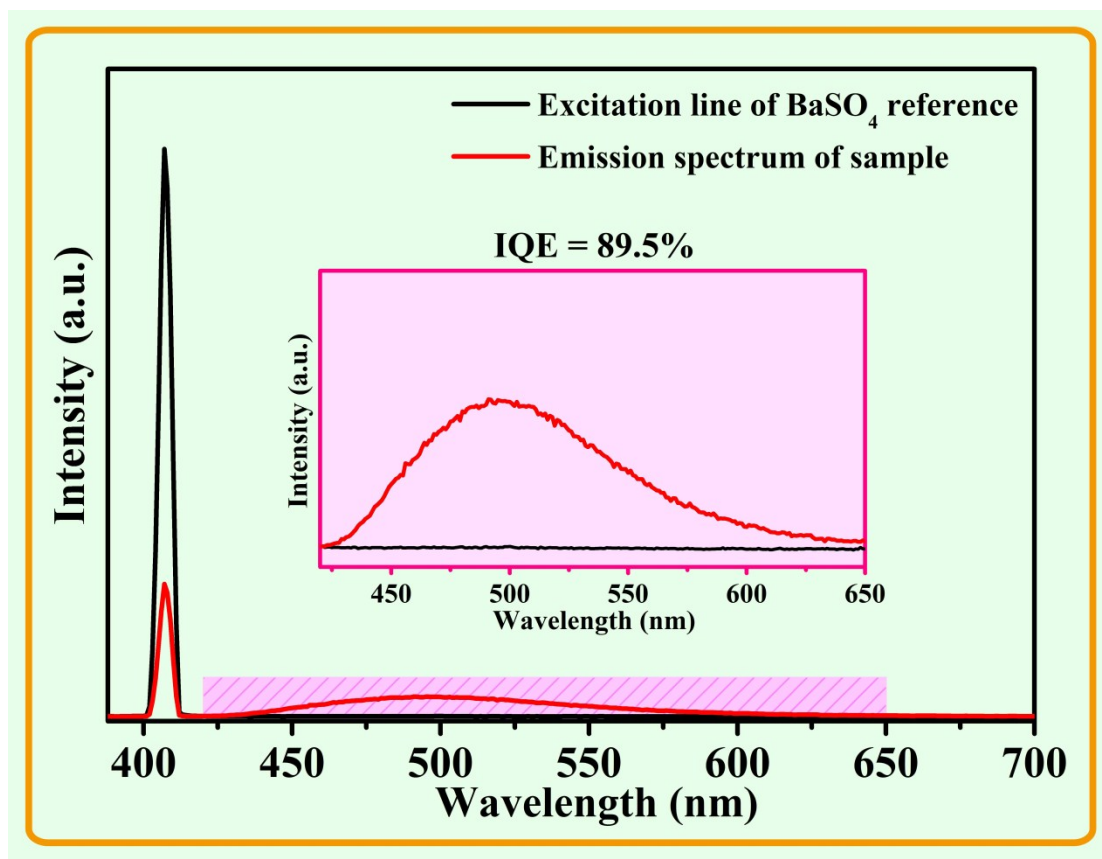

**Figure S3.** Excitation line of BaSO<sub>4</sub> and CYHAO:0.03Ce<sup>3+</sup>, and the emission spectrum of CYHAO:0.03Ce<sup>3+</sup> phosphors collected via an integrating sphere. Inset shows a magnification of the emission spectrum of CYHAO:0.03Ce<sup>3+</sup> in the range of 420-650 nm.



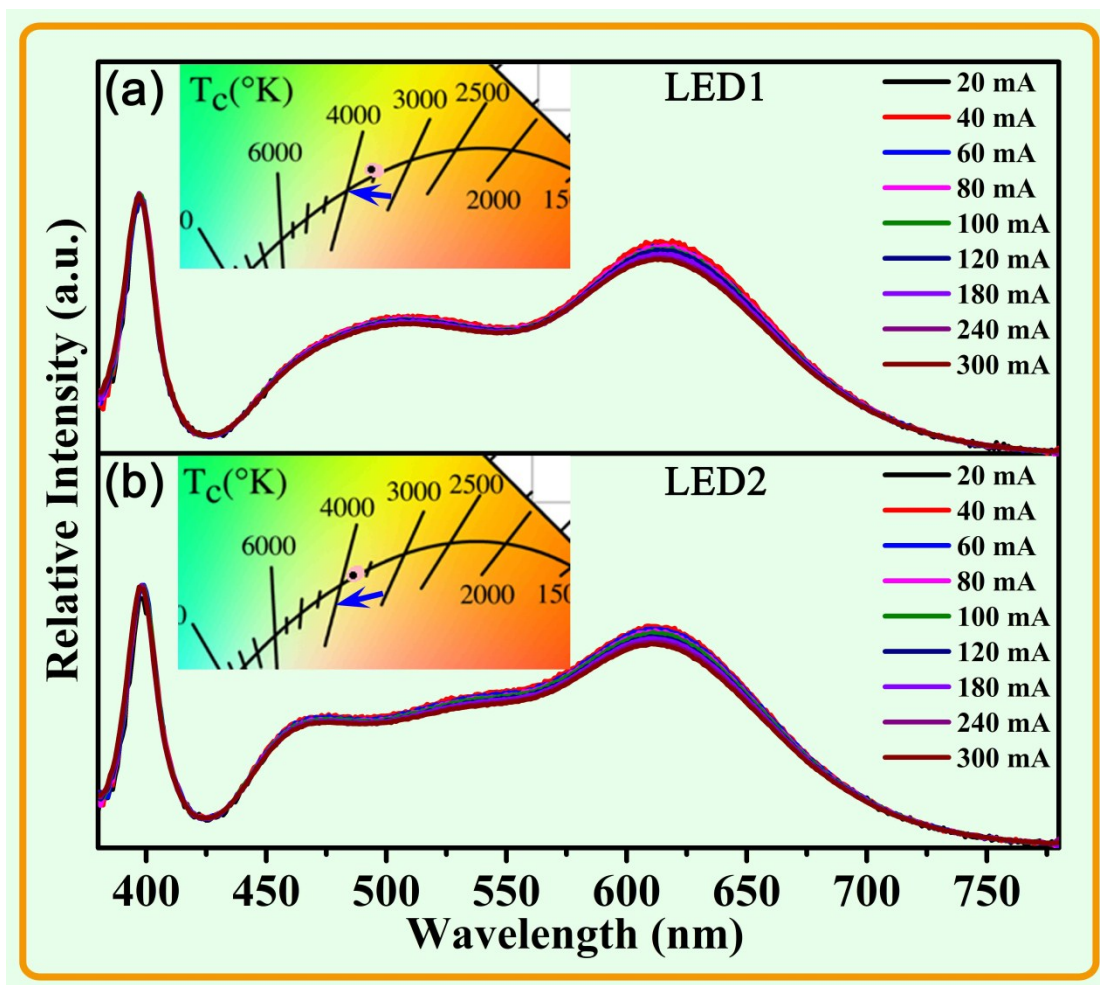

**Figure S4.** EL spectra of the fabricated LED1 (a) and LED2 (b) under various driven currents. Insets show the current-dependent CIE chromaticity coordinates variation of the two LEDs.
